# Supplementary material for: A Label-Free Electrochemical Impedance Cytosensor Based on Specific Peptide-Fused Phage Selected from Landscape Phage Library
Source: PubMed Central journal article supplement (PMC4764921; doi:10.1038/srep22199), 2016-02-24
Supplement: srep22199-s1.pdf [file srep22199-s1.pdf]

## SUPPLEMENTARY INFORMATION

### A Label-Free Electrochemical Impedance Cytosensor Based on Specific Peptide-Fused Phage Selected from Landscape Phage Library

Lei Han<sup>1,2</sup>, Pei Liu<sup>2</sup>, Valery A. Petrenko<sup>3</sup>, Aihua Liu<sup>1,2,\*</sup>

<sup>1</sup>Institute for Biosensing & In-Vitro Diagnostics, and College of Medicine, Qingdao University, 38 Dengzhou Road, Qingdao 266021, China

<sup>2</sup>Laboratory for Biosensing, Qingdao Institute of Bioenergy & Bioprocess Technology, Chinese Academy of Sciences, 189 Songling Road, Qingdao, 266101, China

<sup>3</sup>Department of Pathobiology, College of Veterinary Medicine, Auburn University, 269 Greene Hall, Auburn, Alabama 36849-5519, United States

\*Correspondence and requests for materials should be addressed to A.H.L.

(liuahua@hotmail.com; liuah@qdu.edu.cn)

#### **Table of Contents**

**Figure S1.** The typical UV spectrum of purified phage. ....S2

**Table S1.** Comparison of Various Cytosensors for Detection of Human Cells .....S3

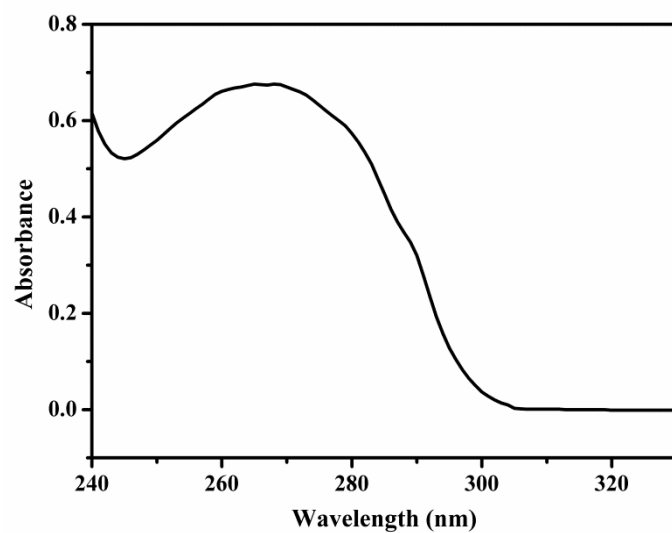

**Figure S1.** The typical UV spectrum of purified phage.

**Table S1.** Comparison of various cytosensors for detection of human cells

| Cytosensor                                                                           | Cell    | Linear range<br>(cells ml <sup>-1</sup> ) | LOD<br>(cells ml <sup>-1</sup> ) | Reference |
|--------------------------------------------------------------------------------------|---------|-------------------------------------------|----------------------------------|-----------|
| Aptamer/PTCA/CRGO/GCE<br>impedance sensor                                            | Hela    | $1.0 \times 10^3 - 1.0 \times 10^6$       | 794                              | 1         |
| Enzyme-linked Con A/<br>3D-architecture interface sensor                             | Hela    | $8.0 \times 10^2 - 2.0 \times 10^7$       | 500                              | 2         |
| FA/PAMAM/AuNPs/GCPE<br>cytosensor                                                    | Hela    | $1.0 \times 10^2 - 1.0 \times 10^6$       | 100                              | 3         |
| VTA@MWCNTs impedance<br>cytosensor                                                   | HL-60   | $2.7 \times 10^2 - 2.7 \times 10^7$       | 90                               | 4         |
| FA/PEI/CMC-G impedance sensor                                                        | HL-60   | $5.0 \times 10^2 - 5.0 \times 10^6$       | 500                              | 5         |
| SWCNTs-AuNPs-gelatin impedance<br>sensor                                             | HL-60   | $1.0 \times 10^4 - 1.0 \times 10^7$       | $5.0 \times 10^3$                | 6         |
| Enzyme-linked -peptide-<br>SWNTs/GCE sensor                                          | BGC-823 | $1.0 \times 10^3 - 1.0 \times 10^7$       | 620                              | 7         |
| PLL/GCE impedance sensor                                                             | Jurkat  | $5.0 \times 10^4 - 1.0 \times 10^7$       | $1.8 \times 10^4$                | 8         |
| Au-cage/Ru(bpy) <sub>3</sub> <sup>2+</sup> -Con A<br>electrochemiluminescence sensor | K562    | $5.0 \times 10^2 - 5.0 \times 10^6$       | 500                              | 9         |
| APBA-MWCNTs/GCE impedance<br>sensor                                                  | K562    | $1.0 \times 10^3 - 1.0 \times 10^7$       | $1.0 \times 10^3$                | 10        |
| CNF/CS/GCE impedance sensor                                                          | K562    | $5.0 \times 10^3 - 1.0 \times 10^7$       | $1.0 \times 10^3$                | 11        |
| Aptamer-nanoparticle strip biosensor                                                 | Ramos   | $4.0 \times 10^3 - 2.0 \times 10^5$       | 800                              | 12        |
| Aptamer-CdSe NPs-PDDA<br>photoelectrochemical cytosensor                             | CEM     | $1.6 \times 10^2 - 1.6 \times 10^3$       | 80                               | 13        |
| Phage-based impedance sensor                                                         | SW620   | $2.0 \times 10^2 - 2.0 \times 10^8$       | 79                               | this work |

PTCA, 3,4,9,10-perylene tetracarboxylic acid;

CRGO, chemically reduced graphene oxide;

FA, folic acid;

PAMAM, poly(amidoamine);

GCPE, glassy carbon paste electrode;

VTA, 2-p-aminophenyl-1, 3, 2-dithiarsenolane;

MWCNTs, multi-walled carbon nanotubes;

PEI, polyethyleneimine;

CMC-G, carboxymethyl chitosan-functionalized graphene;

SWCNTs, single walled carbon nanotube;

AuNPs, gold nanoparticles;

PLL, poly-lysine;

APBA, 3-aminophenylboronic acid;

CNF, carbon nanofiber;  
CS, chitosan;  
PDDA, poly(dimethyldiallylammonium chloride).

## References:

1. Feng L, Chen Y, Ren J, Qu X. A graphene functionalized electrochemical aptasensor for selective label-free detection of cancer cells. *Biomaterials* **32**, 2930-2937 (2011).
2. Zhang J-J, Cheng F-F, Zheng T-T, Zhu J-J. Design and implementation of electrochemical cytosensor for evaluation of cell surface carbohydrate and glycoprotein. *Anal. Chem.* **82**, 3547-3555 (2010).
3. Tepeli Y, Demir B, Timur S, Anik U. An electrochemical cytosensor based on a PAMAM modified glassy carbon paste electrode. *RSC Advances* **5**, 53973-53978 (2015).
4. Xu Y, *et al.* Sensitive detection of tumor cells by a new cytosensor with 3D-MWCNTs array based on vicinal-dithiol-containing proteins (VDPs). *Biosens. Bioelectron.* **66**, 321-326 (2015).
5. Yang G, Cao J, Li L, Rana RK, Zhu J-J. Carboxymethyl chitosan-functionalized graphene for label-free electrochemical cytosensing. *Carbon* **51**, 124-133 (2013).
6. Zhang J-J, Gu M-M, Zheng T-T, Zhu J-J. Synthesis of Gelatin-Stabilized Gold Nanoparticles and Assembly of Carboxylic Single-Walled Carbon Nanotubes/Au Composites for Cytosensing and Drug Uptake. *Anal. Chem.* **81**, 6641-6648 (2009).
7. Cheng W, Ding L, Lei J, Ding S, Ju H. Effective cell capture with tetrapeptide-functionalized carbon nanotubes and dual signal amplification for cytosensing and evaluation of cell surface carbohydrate. *Anal. Chem.* **80**, 3867-3872 (2008).
8. Huang B, Jia N, Chen L, Tan L, Yao S. Electrochemical impedance spectroscopy study on polymerization of L-lysine on electrode surface and its application for immobilization and detection of suspension cells. *Anal. Chem.* **86**, 6940-6947 (2014).
9. Ge L, Su M, Gao C, Tao X, Ge S. Application of Au cage/Ru(bpy)<sub>3</sub><sup>2+</sup> nanostructures for the electrochemiluminescence detection of K562 cancer cells based on aptamer. *Sensors Actuators B: Chem.* **214**, 144-151 (2015).
10. Zhong X, Bai H-J, Xu J-J, Chen H-Y, Zhu Y-H. A Reusable Interface Constructed by 3-Aminophenylboronic Acid-Functionalized Multiwalled Carbon Nanotubes for Cell Capture, Release, and Cytosensing. *Adv. Funct. Mater.* **20**, 992-999 (2010).
11. Hao C, Ding L, Zhang X, Ju H. Biocompatible Conductive Architecture of Carbon Nanofiber-Doped Chitosan Prepared with Controllable Electrodeposition for Cytosensing. *Anal. Chem.* **79**, 4442-4447 (2007).
12. Liu G, Mao X, Phillips JA, Xu H, Tan W, Zeng L. Aptamer-Nanoparticle Strip Biosensor for Sensitive Detection of Cancer Cells. *Anal. Chem.* **81**, 10013-10018 (2009).
13. Zhang X, Li S, Jin X, Li X. Aptamer Based Photoelectrochemical Cytosensor with layer-by-layer assembly of CdSe semiconductor nanoparticles as photoelectrochemically active species. *Biosens. Bioelectron.* **26**, 3674-3678 (2011).
